# Supplementary material for: Glucose Phosphorylation Is Required for Mycobacterium tuberculosis Persistence in Mice
Source: PubMed Central journal article supplement (PMC3542180; doi:10.1371/journal.ppat.1003116), 2013-01-10

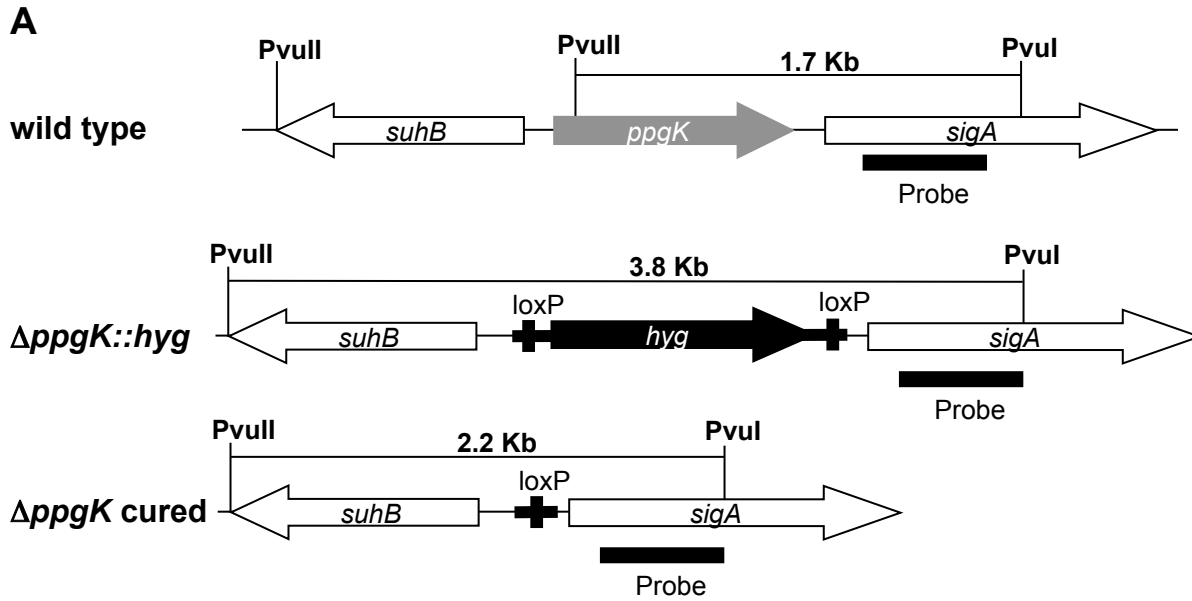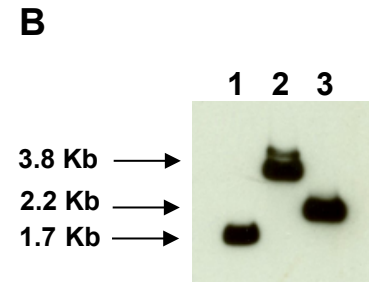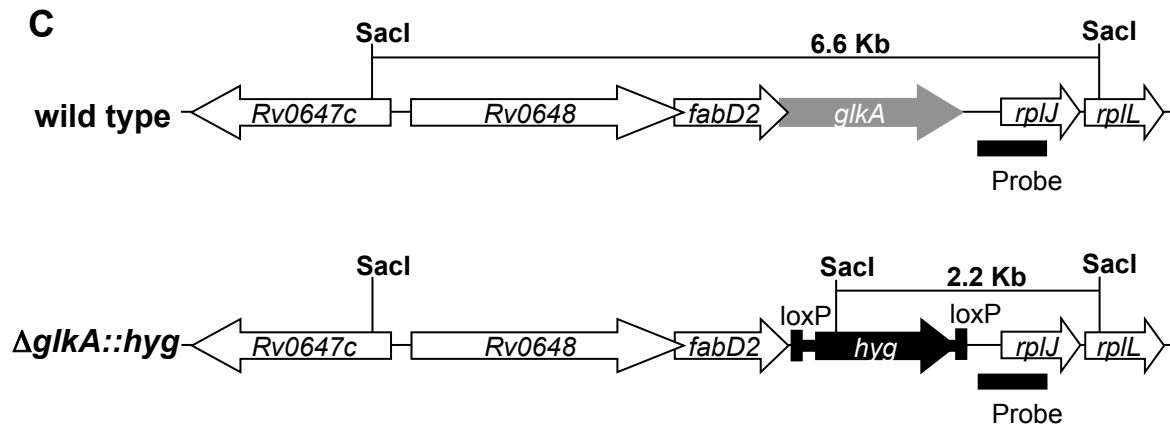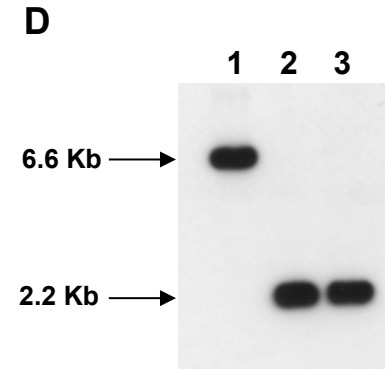

Supplement: ppat.1003116.s001.pdf [file ppat.1003116.s001.pdf]
