# Supplementary material for: Glucose Phosphorylation Is Required for Mycobacterium tuberculosis Persistence in Mice
Source: PubMed Central journal article supplement (PMC3542180; doi:10.1371/journal.ppat.1003116), 2013-01-10
Supplement: ppat.1003116.s005.pdf [file ppat.1003116.s005.pdf]

**Table S1. Enzymatic quantification of of glucose-6-P and fructose-6-P metabolite pools in cell extracts from wt and glucokinase mutants.**

| <b>Strain</b>            | <b>Grown with glucose</b>        |                                   | <b>Grown with glycerol</b>       |                                   |
|--------------------------|----------------------------------|-----------------------------------|----------------------------------|-----------------------------------|
|                          | <b>Glucose-6-P<br/>(pmol/mg)</b> | <b>Fructose-6-P<br/>(pmol/mg)</b> | <b>Glucose-6-P<br/>(pmol/mg)</b> | <b>Fructose-6-P<br/>(pmol/mg)</b> |
| wt                       | 5408 ± 956                       | 2713 ± 554                        | 1860 ± 197                       | 1614 ± 74                         |
| <i>ΔppgK</i>             | 1351 ± 526 *                     | 1365 ± 484 *                      | 1617 ± 375                       | 1576 ± 819                        |
| <i>ΔglkA</i>             | 4386 ± 1765                      | 2075 ± 1154                       | 1916 ± 104                       | 1709 ± 839                        |
| <i>ΔppgKΔglkA</i>        | nd                               | nd                                | 1807 ± 529                       | 1706 ± 901                        |
| <i>ΔppgK + ppgK</i>      | 4402 ± 1520                      | 2728 ± 920                        | 1567 ± 310                       | 1542 ± 715                        |
| <i>ΔppgKΔglkA + ppgK</i> | 5456 ± 2922                      | 3029 ± 1341                       | 2610 ± 819                       | 1971 ± 623                        |
