# Supplementary material for: Glucose Phosphorylation Is Required for Mycobacterium tuberculosis Persistence in Mice
Source: PubMed Central journal article supplement (PMC3542180; doi:10.1371/journal.ppat.1003116), 2013-01-10
Supplement: ppat.1003116.s006.pdf [file ppat.1003116.s006.pdf]

**Table S2. Expression of antioxidant genes in wt and  $\Delta ppgK\Delta glkA$ .**

| <b>Gene</b>  | mRNA fold induction |                                            |
|--------------|---------------------|--------------------------------------------|
|              | <b>wt</b>           | <b><math>\Delta ppgK\Delta glkA</math></b> |
| <i>katG</i>  | 31.8 ± 9.8          | 53.0 ± 3.5                                 |
| <i>ahpC</i>  | 3.0 ± 0.4           | 3.0 ± 2.1                                  |
| <i>thiX</i>  | 2.0 ± 0.4           | 6.0 ± 0.8                                  |
| <i>trxB1</i> | 19.3 ± 1.7          | 36.9 ± 11.4                                |
| <i>trxB2</i> | 6.1 ± 4.4           | 17.7 ± 4.4                                 |
